# Supplementary material for: Cadmium(ii) complexes with a 4-acyl pyrazolone derivative and co-ligands: crystal structures and antitumor activity
Source: Royal Society of Chemistry journal article supplement (doi:10.1039/c6ra23938b), 2016-01-01
Supplement: c6ra23938b1.pdf [file c6ra23938b1.pdf]

## Supporting Information

### **Cadmium(II) complexes with a 4-acyl pyrazolone derivative and co-ligands: crystal structure and antitumor activity**

**Hua-Ying Luo,<sup>a</sup> Jin-Yu Li,<sup>b</sup> Yue Li,<sup>a</sup> Li Zhang,<sup>a</sup> Jin-Yao Li,<sup>\*b</sup> Dian-Zeng Jia,<sup>a</sup>  
Guan-Cheng Xu<sup>\*a</sup>**

<sup>a</sup> Key Laboratory of Energy Materials Chemistry (Xinjiang University), Ministry of Education. Key Laboratory of Advanced Functional Materials, Autonomous Region. Institute of Applied Chemistry, Xinjiang University, Urumqi, 830046 Xinjiang, PR China.

E-mail: [xuguanchengxju@163.com](mailto:xuguanchengxju@163.com)

<sup>b</sup> Xinjiang Key Laboratory of Biological Resources and Genetic Engineering, College of Life Science and Technology, Xinjiang University, Urumqi, 830046 Xinjiang, PR China.

E-mail: [ljyxju@xju.edu.cn](mailto:ljyxju@xju.edu.cn)

Table S1 Selected bond lengths (Å) and angles (°) for ligand and complexes **1-3**.

---

| <b>H<sub>2</sub>L</b> |            |            |            |
|-----------------------|------------|------------|------------|
| C7-O1                 | 1.2619(19) | C11-N3     | 1.3320(19) |
| C18-O2                | 1.2398(18) | C18-N4     | 1.3463(19) |
| N3-N4                 | 1.3853(17) |            |            |
| <b>Complex 1</b>      |            |            |            |
| Cd1-O3                | 2.313(3)   | Cd1-O2     | 2.315(3)   |
| Cd1-N3                | 2.340(4)   |            |            |
| O3-Cd1-O3A            | 82.28(16)  | O2A-Cd1-N3 | 123.46(12) |
| O3-Cd1-O2A            | 83.11(12)  | O2-Cd1-N3  | 70.48(12)  |
| O3-Cd1-N3A            | 97.87(12)  | O3-Cd1-O2  | 83.16(12)  |
| O3A-Cd1-O2            | 83.11(12)  | O2A-Cd1-O2 | 161.73(17) |
| O2-Cd1-N3A            | 123.46(12) | O3-Cd1-N3  | 153.36(12) |
| N3-Cd1-N3A            | 93.64(19)  | O3A-Cd1-N3 | 97.87(12)  |
| <b>Complex 2</b>      |            |            |            |
| Cd1-O4                | 2.299(5)   | Cd1-N3     | 2.338(5)   |
| Cd1-N10               | 2.319(6)   | Cd1-N7     | 2.357(6)   |
| Cd1-O2                | 2.337(5)   | Cd1-N9     | 2.370(6)   |
| O4-Cd1-N10            | 158.19(18) | O2-Cd1-N7  | 86.19(18)  |
| O4-Cd1-O2             | 87.24(17)  | N3-Cd1-N7  | 155.56(19) |
| N10-Cd1-O2            | 114.39(18) | O4-Cd1-N9  | 87.68(18)  |
| O4-Cd1-N3             | 101.15(17) | N10-Cd1-N9 | 70.51(19)  |
| N10-Cd1-N3            | 89.49(19)  | O2-Cd1-N9  | 170.20(17) |
| O2-Cd1-N3             | 70.16(17)  | N3-Cd1-N9  | 119.11(19) |
| O4-Cd1-N7             | 70.70(18)  | N7-Cd1-N9  | 84.22(19)  |
| N10-Cd1-N7            | 106.4(2)   |            |            |
| <b>Complex 3</b>      |            |            |            |
| Cd1-O4                | 2.301(4)   | Cd1-N10    | 2.348(5)   |
| Cd1-N3                | 2.307(5)   | Cd1-N9     | 2.354(5)   |

|            |            |            |            |
|------------|------------|------------|------------|
| Cd1-O2     | 2.339(4)   | Cd1-N7     | 2.370(5)   |
| O4-Cd1-N3  | 95.21(15)  | O2-Cd1-N9  | 94.72(16)  |
| O4-Cd1-O2  | 96.36(14)  | N10-Cd1-N9 | 71.37(18)  |
| N3-Cd1-O2  | 70.58(15)  | O4-Cd1-N7  | 70.67(14)  |
| O4-Cd1-N10 | 98.72(16)  | N3-Cd1-N7  | 158.92(16) |
| N3-Cd1-N10 | 119.50(16) | O2-Cd1-N7  | 94.87(14)  |
| O2-Cd1-N10 | 160.79(16) | N10-Cd1-N7 | 79.09(16)  |
| O4-Cd1-N9  | 168.19(17) | N9-Cd1-N7  | 112.43(17) |
| N3-Cd1-N9  | 84.64(17)  |            |            |

---

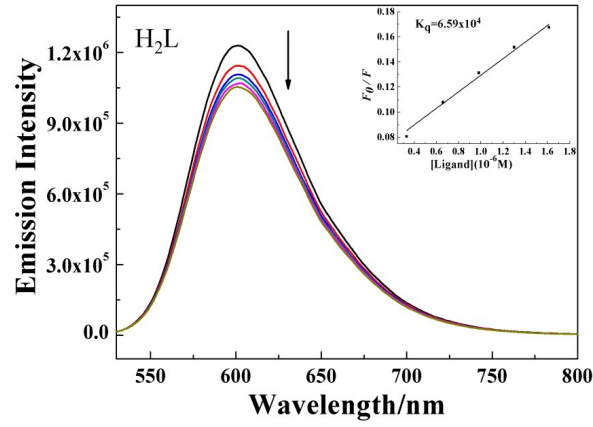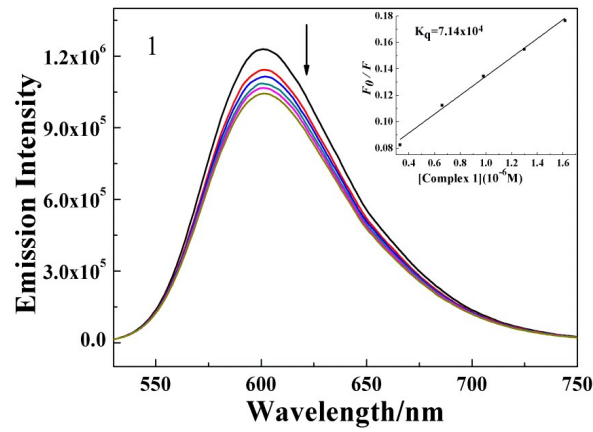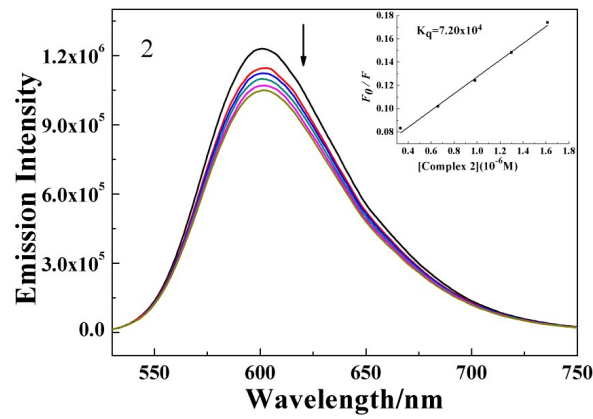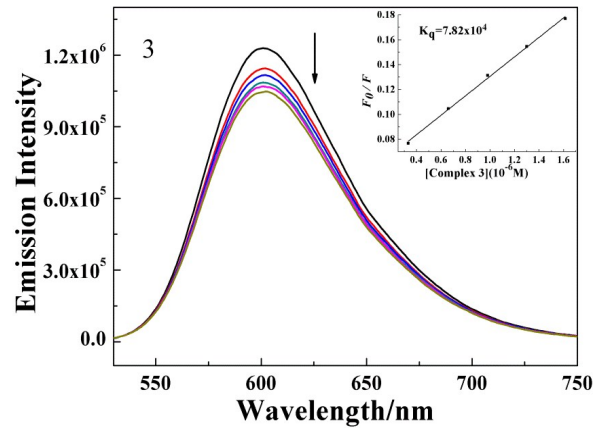

**Fig. S1** The emission spectra of EB-DNA system in the absence and presence of increasing amount of the ligand and complexes **1-3**.  $\lambda_{\text{ex}} = 530.0 \text{ nm}$ ,  $\lambda_{\text{em}} = 590 \text{ nm}$ ,  $[\text{DNA}] = 271 \text{ } \mu\text{M}$ ,  $[\text{EB}] = 9.0 \text{ } \mu\text{M}$ ,  $[\text{complex}] = 0-1.6 \text{ } \mu\text{M}$  from up to down respectively. Arrow shows the changes on addition of the ligand and complexes.

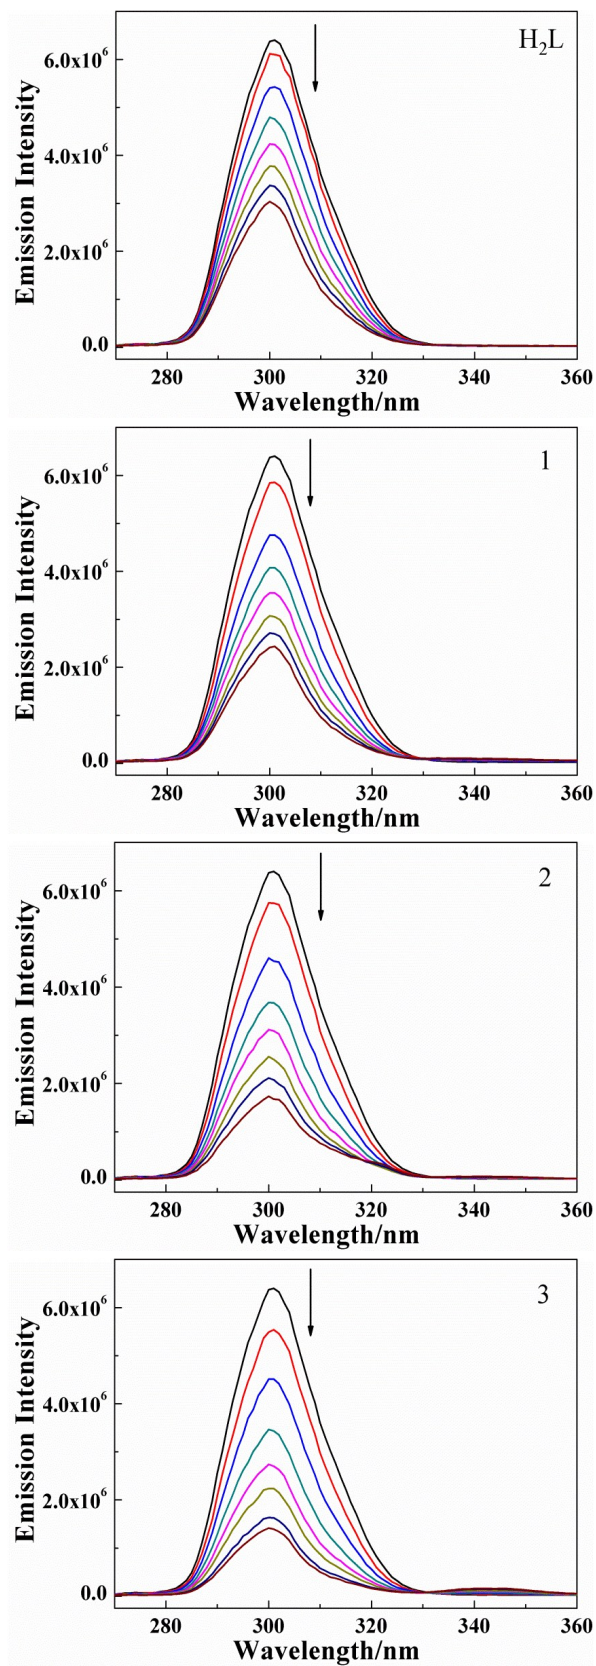

**Fig. S2** Synchronous spectra of BSA (5.1  $\mu$ M) in the presence of increasing amounts of ligand and complexes **1-3** at a wavelength difference of  $\Delta\lambda = 15$  nm.

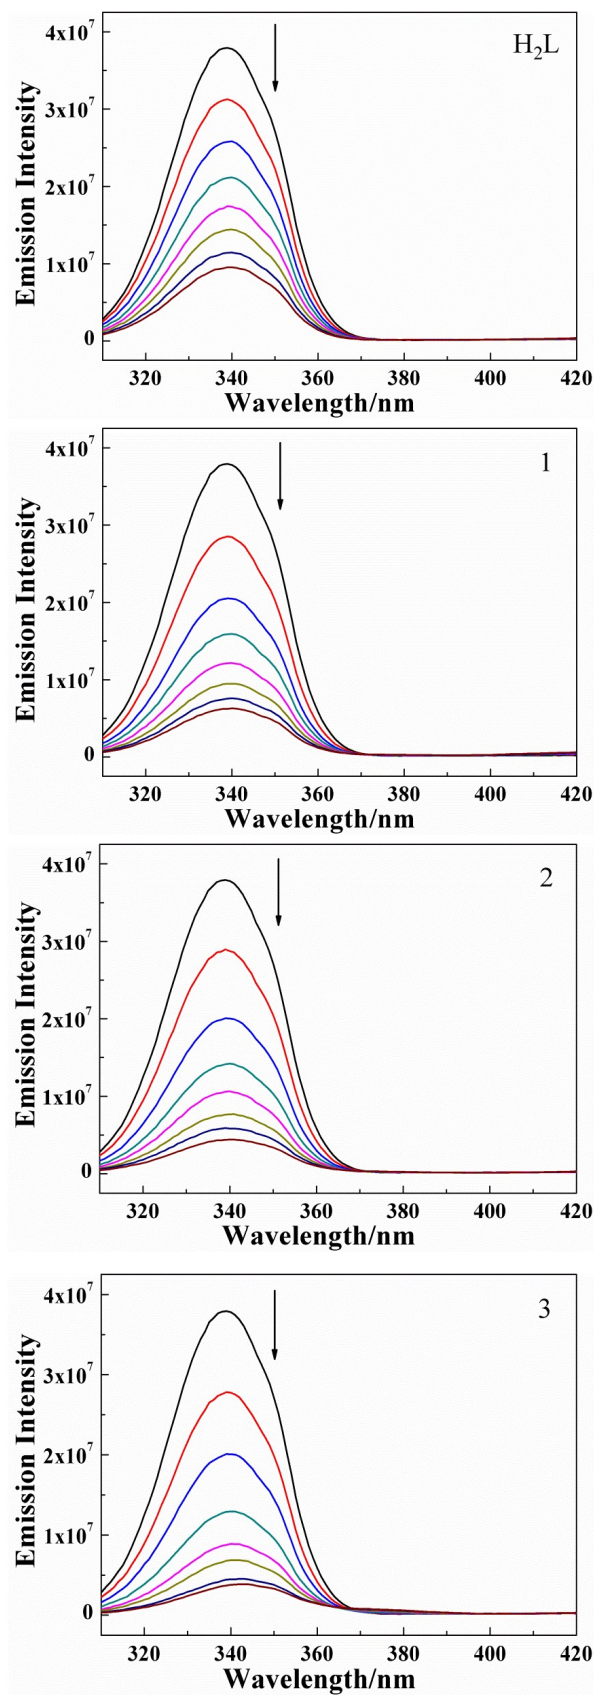

**Fig. S3** Synchronous spectra of BSA (5.1  $\mu\text{M}$ ) in the presence of increasing amounts of ligand and complexes **1-3** at a wavelength difference of  $\Delta\lambda = 60$  nm.

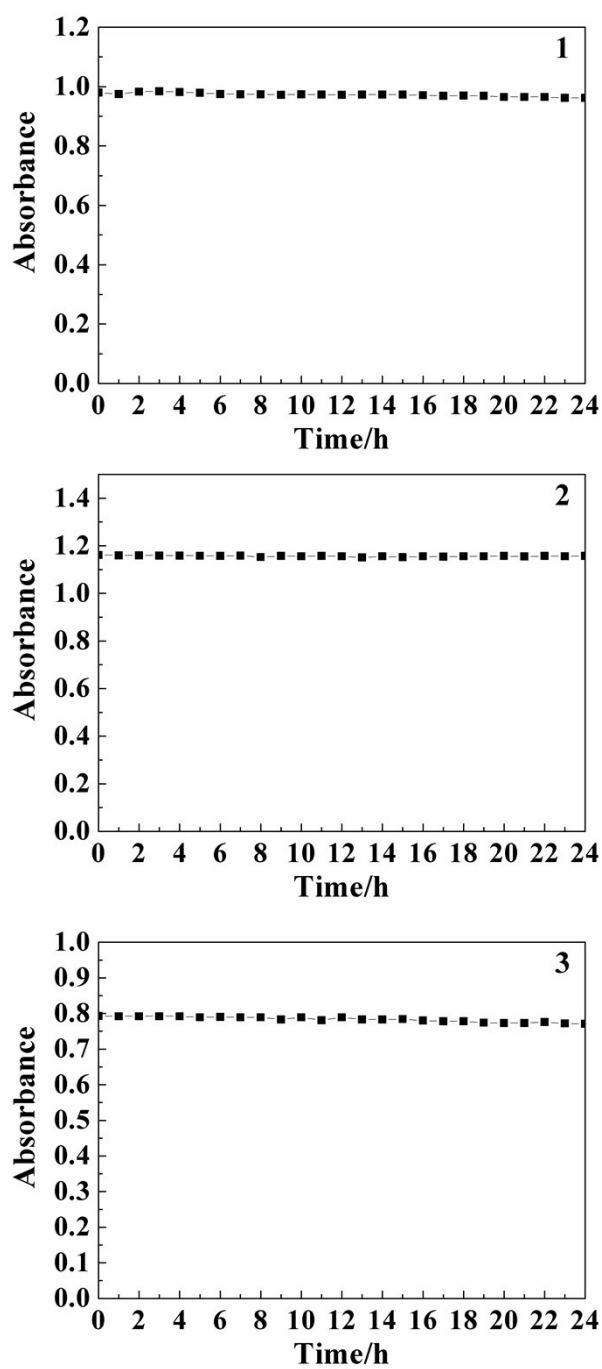

**Fig. S4** The time-dependent UV absorbance of the complexes **1-3** at 250, 252 and 262 nm, respectively. The complexes were dissolved in the solution used for the biological tests and keep the solution at 37 °C.
